# Supplementary material
Source: ML conference proceedings conference paper supplement (https://openreview.net/forum?id=TIsrnWpjQ0)
Supplement: supplementary_material [file attachment]

# TabCBM: Concept-based Interpretable Neural Networks for Tabular Data

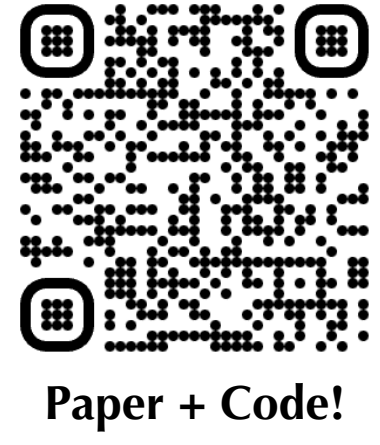

Paper + Code!

Mateo Espinosa Zarlenga, Zohreh Shams, Michael E. Nelson, Been Kim\*, Mateja Jamnik\*

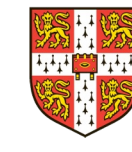

UNIVERSITY OF  
CAMBRIDGE

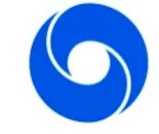

Google DeepMind

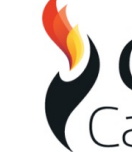

GATES  
Cambridge

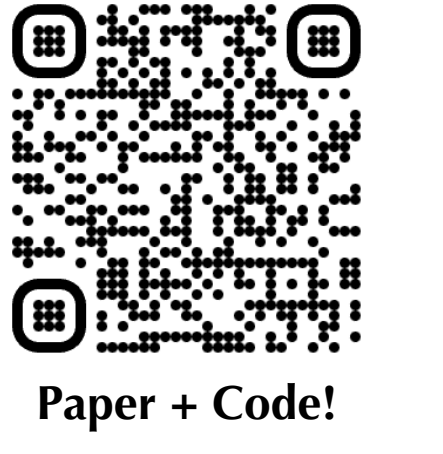

Paper + Code!

## Research Gap: How do tabular tasks fit within concept-based interpretable frameworks?

- Recent work in explainable artificial intelligence (XAI) [1-4] has proposed interpretable neural networks that explain predictions via high-level “concepts”.
- However, previous works in this field have been uniquely focused on image [2], graph-structured [3], and text [4] tasks, **leaving crucial tabular tasks, such as clinical and genomics tasks, outside of the scope of these methods.**

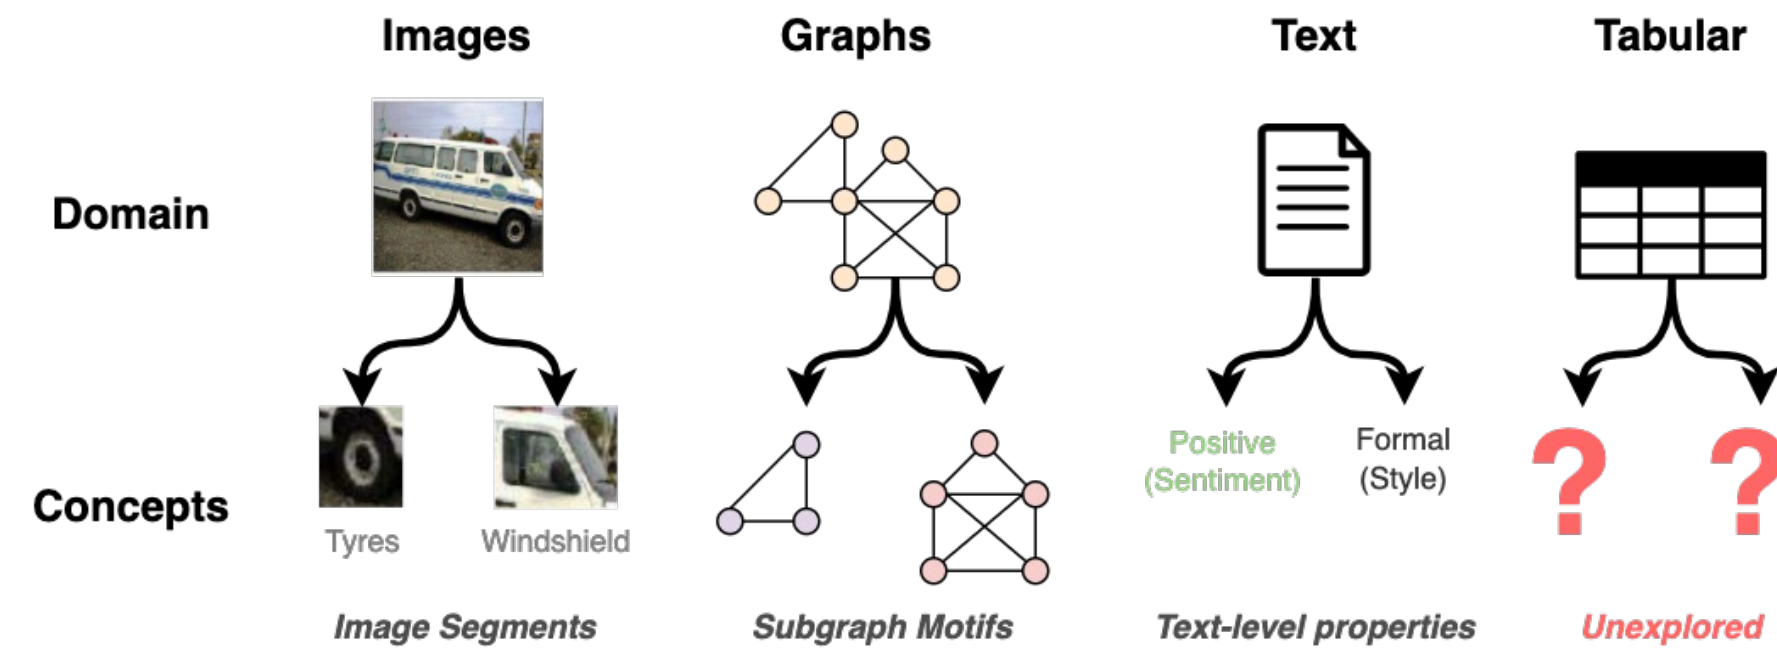

- Hence, in this work we explore (1) **what a concept entails in a tabular task** and (2) **how we can construct concept-interpretable models** without sacrificing the performance observed in simpler state-of-the-art tabular methods (e.g., GBMs).

## Main Results

### Key Finding #1: Interpretability without sacrificing performance

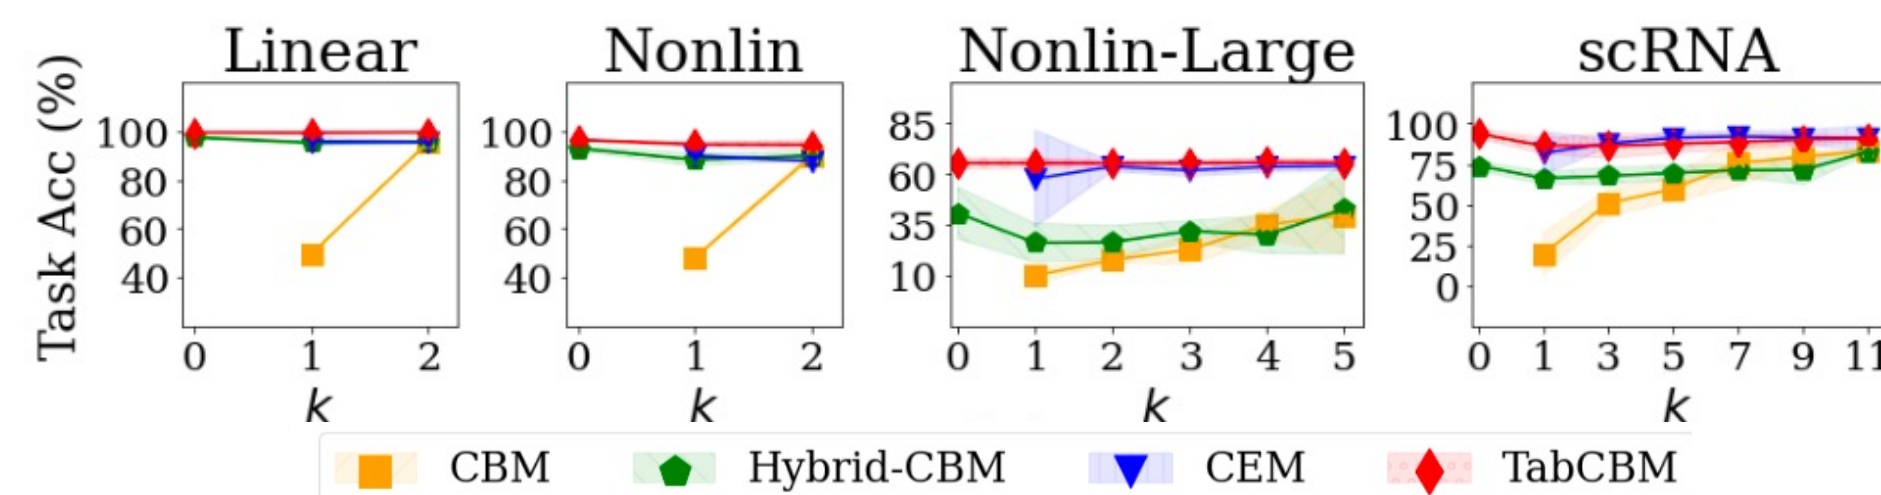

**Figure 1:** Task accuracy (%) of concept-interpretable methods across synthetic tabular tasks with known ground truth concepts. We show the accuracy as we vary the number of training concepts  $k$ .

| Dataset                    | TabCBM (ours)       | SENN         | CCD (recon)  | MLP          | TabNet       | TabTransformer | XGBoost      | LightGBM            |
|----------------------------|---------------------|--------------|--------------|--------------|--------------|----------------|--------------|---------------------|
| Synth-Linear               | <b>99.84 ± 0.06</b> | 98.15 ± 0.2  | 96.47 ± 1.3  | 97.57 ± 0.37 | 97.57 ± 0.37 | 82.91 ± 0.55   | 96.43        | 96.8                |
| Synth-Nonlin               | <b>98.36 ± 0.15</b> | 89.14 ± 0.71 | 85.99 ± 2.28 | 87.65 ± 0.98 | 91.57 ± 0.48 | 81.07 ± 0.83   | 88.43        | 89.33               |
| Synth-Nonlin-Large         | <b>62.78 ± 1.13</b> | 49.78 ± 2.08 | 51.64 ± 1.71 | 40.73 ± 6.42 | 51.01 ± 2.57 | 54.63 ± 1.17   | 22.48 ± 0.48 | 23.58 ± 0.78        |
| Synth-scRNA                | <b>93.66 ± 1.41</b> | 78.32 ± 3.03 | 68.83 ± 1.73 | 73.87 ± 1.43 | 90.66 ± 1.10 | 87.29 ± 0.68   | 90.44 ± 1.06 | 89.96 ± 1.57        |
| Higgs (without high-level) | <b>80.42 ± 0.3</b>  | 70.61 ± 0.12 | 77.84 ± 0.08 | 79.90 ± 0.15 | 79.44 ± 0.16 | 74.94 ± 0.21   | 68.85 ± 0.02 | 68.87 ± 0.06        |
| Higgs (with high-level)    | <b>78.62 ± 0.12</b> | 73.53 ± 0.71 | 77.92 ± 0.09 | 78.44 ± 0.02 | 78.12 ± 0.05 | 74.22 ± 0.42   | 75.33 ± 0.04 | 75.33 ± 0.03        |
| PBMC                       | <b>93.35 ± 0.16</b> | 92.24 ± 0.23 | 93.14 ± 0.30 | 91.66 ± 1.95 | 92.74 ± 0.46 | 91.01 ± 0.33   | 93.09 ± 0.29 | 93.01 ± 0.24        |
| FICO                       | 72.08 ± 0.42        | 66.78 ± 0.69 | 65.46 ± 4.91 | 67.98 ± 1.36 | 71.20 ± 0.87 | 65.66 ± 0.85   | 72.33 ± 0.44 | <b>72.63 ± 0.12</b> |

**Table 1:** Task accuracy (%) of competing methods across tabular tasks *without* ground truth concept labels at train time.

## Key idea: Feature subsets as tabular concepts

Given a task on  $n$  input features, we define a tabular concept as a fixed **group of highly correlated features**  $\pi \in [0, 1]^n$  that form the input to a scoring function representing a “meta feature”  $s: \mathbb{R}^{\sum \pi_i} \rightarrow \{0, 1\}$ .

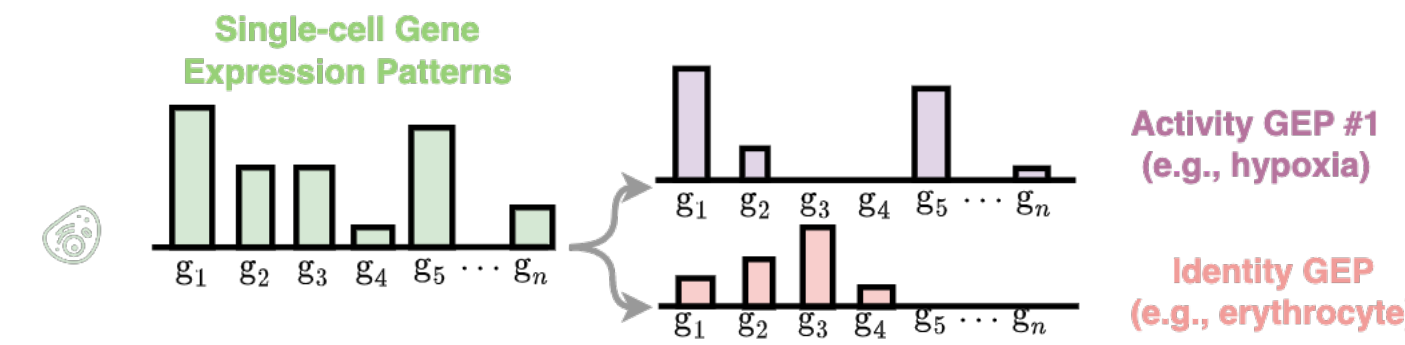

## Tabular Concept Bottleneck Model (TabCBM)

We discover concepts via a **differentiable feature selection** mechanism that learns  $k'$  pairs  $\{(\hat{\pi}^{(i)}, s^{(i)})\}_{i=1}^{k'}$  of subsets of features  $\hat{\pi}^{(i)}$  and scoring functions  $s^{(i)}$  from which a **bottleneck of concept scores**  $\hat{c} \in [0, 1]^k$  can be used to predict a downstream task.

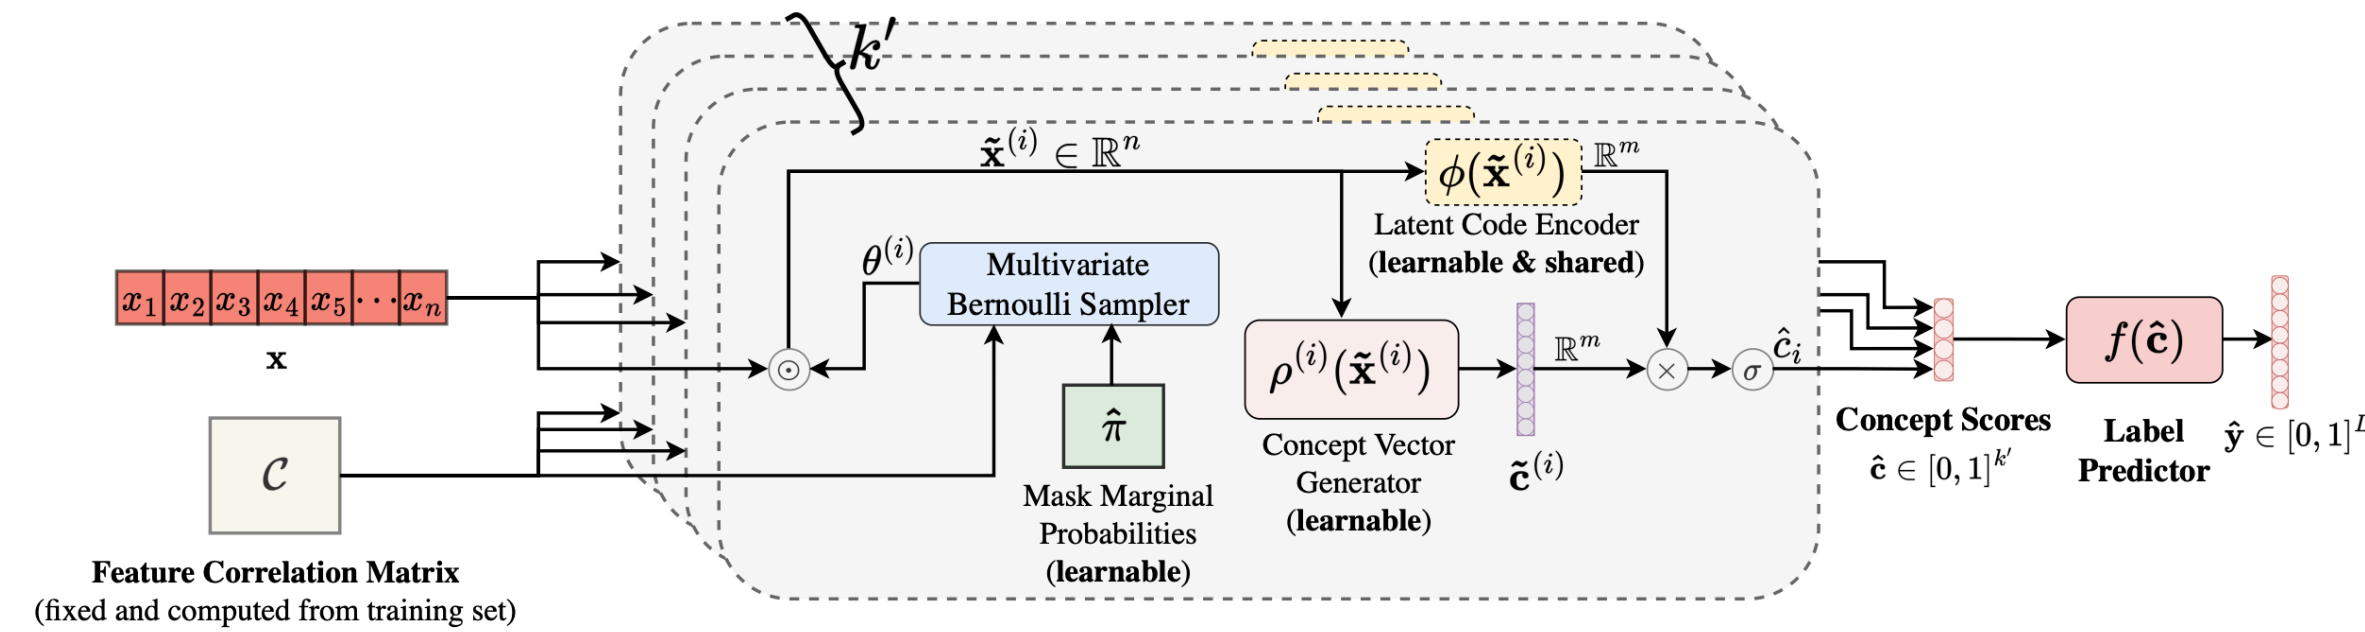

### Key Finding #2: TabCBM discovers tabular concepts aligned with expert-annotated concepts

|               | CAS (coherence)                          | MIG (diversity)                          | $R^4$ (coherence & diversity)            | Dis (diversity)                          | Compl (completeness)                     |
|---------------|------------------------------------------|------------------------------------------|------------------------------------------|------------------------------------------|------------------------------------------|
| TabCBM (ours) | <b>87.55 ± 14.07</b> ( $\bar{r} = 1.5$ ) | <b>57.71 ± 26.27</b> ( $\bar{r} = 1.5$ ) | <b>78.36 ± 17.65</b> ( $\bar{r} = 1.5$ ) | <b>69.83 ± 23.65</b> ( $\bar{r} = 1.5$ ) | <b>70.44 ± 22.81</b> ( $\bar{r} = 1.5$ ) |
| SENN          | 60.11 ± 6.26 ( $\bar{r} = 2.75$ )        | 9.92 ± 5.68 ( $\bar{r} = 3.5$ )          | 30.83 ± 17.38 ( $\bar{r} = 3.5$ )        | 21.49 ± 6.51 ( $\bar{r} = 3.5$ )         | 29.56 ± 7.30 ( $\bar{r} = 3.75$ )        |
| CCD           | 52.86 ± 20.82 ( $\bar{r} = 3$ )          | 29.57 ± 5.86 ( $\bar{r} = 2$ )           | 65.79 ± 10.49 ( $\bar{r} = 2$ )          | 39.66 ± 5.89 ( $\bar{r} = 2$ )           | 41.04 ± 6.93 ( $\bar{r} = 2.25$ )        |
| PCA           | 57.54 ± 12.89 ( $\bar{r} = 2.75$ )       | 9.48 ± 5.73 ( $\bar{r} = 3$ )            | 19.59 ± 28.18 ( $\bar{r} = 3$ )          | 24.15 ± 16.9 ( $\bar{r} = 3$ )           | 36.17 ± 15.86 ( $\bar{r} = 2.25$ )       |

**Table 2:** Mean concept representation quality metrics (%) measured across several synthetic datasets with ground-truth concept annotations (higher values are better).

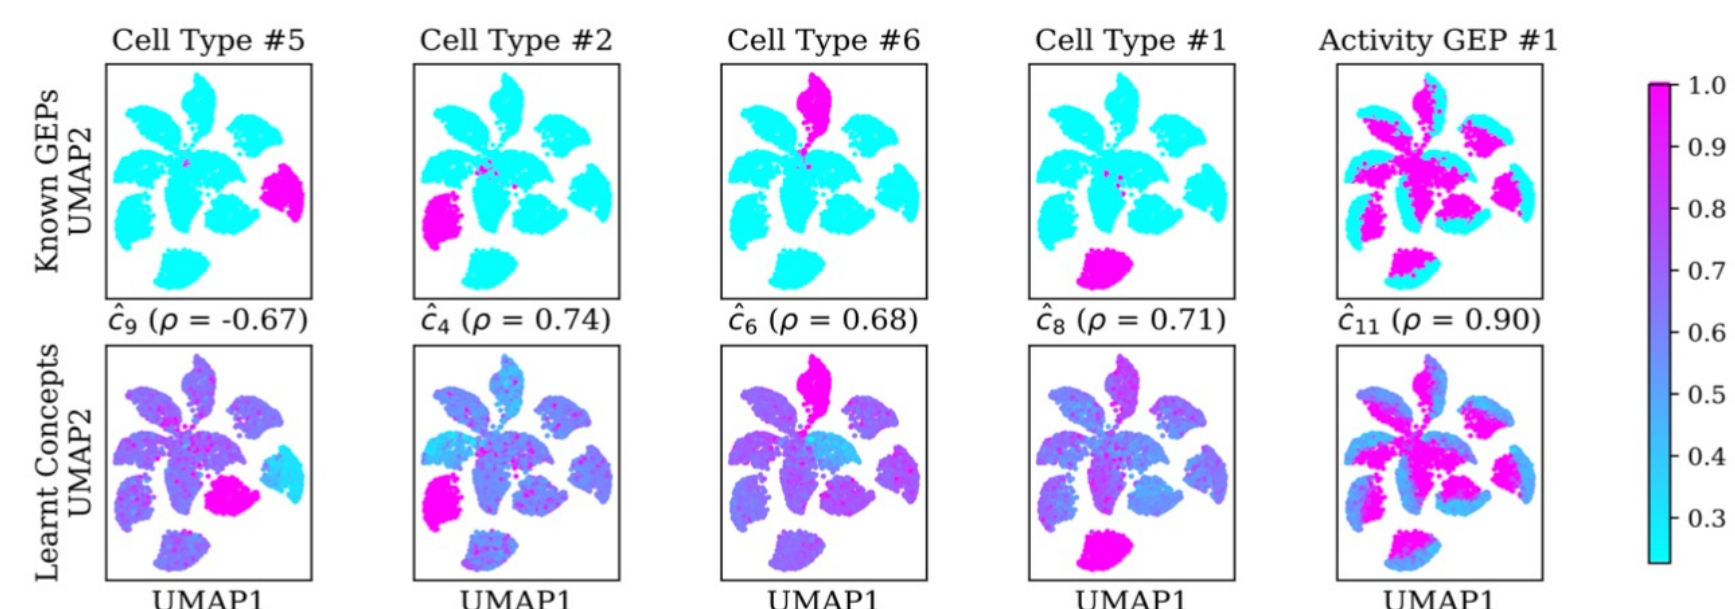

**Figure 2:** Five known Gene Expression Programs (GEPs) in a synthetic scRNA task together with TabCBM's discovered concept with the highest absolute correlation with each GEP.

## Training: How do we learn meaningful concepts?

We include regularisers that encourage:

- Completeness**  $\rightarrow$  discovered concept scores  $\hat{c}$  should predict a task of interest.

$$\mathcal{L}_{\text{task}}(f(\hat{c}), y)$$

- Coherency**  $\rightarrow$  Similar samples should lead to a similar set of concept scores.

$$\mathcal{L}_{\text{co}}(\mathbf{x}_1, \dots, \mathbf{x}_N) := -\frac{1}{Nt} \sum_{\mathbf{x}_i \in \{\mathbf{x}_1, \dots, \mathbf{x}_N\}} \sum_{\phi(\mathbf{x}_j) \in \Psi_i(\phi(\mathbf{x}_i))} \frac{\hat{c}(\mathbf{x}_i)^T \hat{c}(\mathbf{x}_j)}{\|\hat{c}(\mathbf{x}_i)\| \|\hat{c}(\mathbf{x}_j)\|}$$

- Diversity**  $\rightarrow$  different scoring functions and masks represent different concepts.

$$\mathcal{L}_{\text{div}}(\mathbf{x}_1, \dots, \mathbf{x}_N) := \frac{1}{Nk'(k'-1)} \sum_{\mathbf{x} \in \{\mathbf{x}_1, \dots, \mathbf{x}_N\}} \sum_{i=1}^{k'} \sum_{j=1, j \neq i}^{k'} \frac{\rho_j(\tilde{\mathbf{x}}^{(i)})^T \rho_i(\tilde{\mathbf{x}}^{(i)})}{\|\rho_j(\tilde{\mathbf{x}}^{(i)})\| \|\rho_i(\tilde{\mathbf{x}}^{(i)})\|}$$

- Specificity**  $\rightarrow$  concepts should be a function of only a handful of input features.

$$\mathcal{L}_{\text{spec}}(\hat{\pi}^{(1)}, \dots, \hat{\pi}^{(k')}) := \frac{1}{k'n} \sum_{i=1}^{k'} \|\hat{\pi}^{(i)}\|_1$$

Furthermore, as in traditional concept bottleneck models (CBMs) [1], **we can include supervision for known concepts** when we have train-time concept labels.

## References

- [1] Koh, Pang Wei, et al. "Concept bottleneck models." *International Conference on Machine Learning*. PMLR, 2020.
- [2] Ghorbani, Amirata, et al. "Towards automatic concept-based explanations in deep neural networks." *Advances in neural information processing systems* 32 (2019): 20554-20565.
- [3] Magister, Lucie Charlotte, et al. "GCEExplainer: Human-in-the-loop concept-based explanations for graph neural networks." *arXiv preprint arXiv:2107.11889* (2021).
- [4] Yeh, Chih-Kuan, et al. "On completeness-aware concept-based explanations in deep neural networks." *Advances in neural information processing systems* 33 (2020): 20554-20565.

### Key Finding #3: Performance can be boosted via human-in-the-loop concept interventions

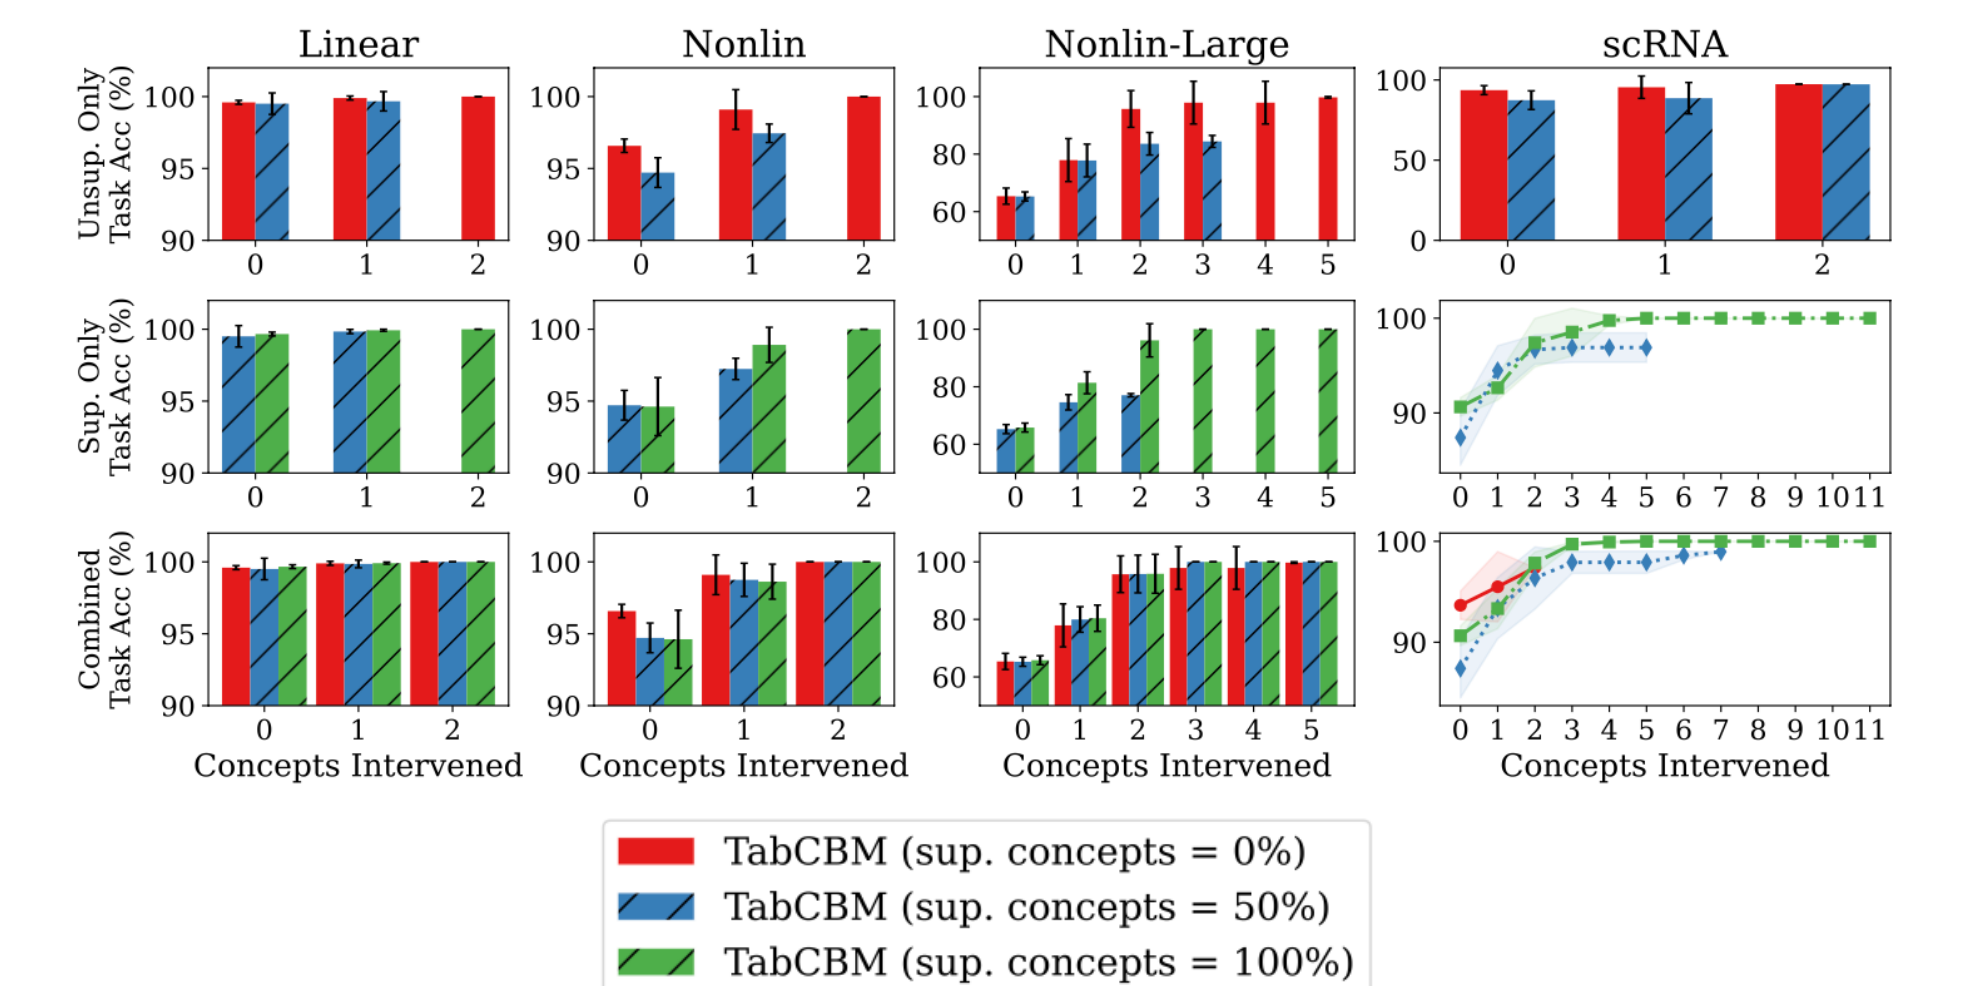

**Figure 3:** TabCBM task accuracy after intervening on a varying number of concepts (x-axis), across tasks (columns), and varying whether we intervene only on supervised concepts (rows).
